# Supplementary material for: Association between CT-Based Preoperative Sarcopenia and Outcomes in Patients That Underwent Liver Resections
Source: MDPI journal article supplement (doi:10.3390/cancers14010261), 2022-01-05
Supplement: s1 [file s1]

Supplementary Files

# Associations between CT-Based Preoperative Sarcopenia and Outcomes in Patients That Underwent Liver Resections

David Martin, Yaël Maeder, Kosuke Kobayashi, Michael Schneider, Joachim Koerfer, Emmanuel Melloul, Nermin Halkic, Martin Hübner, Nicolas Demartines, Fabio Becce and Emilie Uldry

**Table S1.** Clinical outcomes of patients that underwent major hepatectomies

| Outcome                             | Overall ( <i>n</i> = 190) | Non-sarcopenia ( <i>n</i> = 73) | Sarcopenia ( <i>n</i> = 117) | <i>p</i> -value |
|-------------------------------------|---------------------------|---------------------------------|------------------------------|-----------------|
| <b>Length of stay</b> (median, IQR) | 12 (7–20)                 | 11 (7–19)                       | 13 (8–21)                    | 0.196           |
| <b>30-day complications, (%)</b>    |                           |                                 |                              |                 |
| Any                                 | 118 (51)                  | 51 (70)                         | 67 (57)                      | 0.092           |
| Major                               | 31 (16)                   | 12 (16)                         | 19 (16)                      | 1.000           |
| <b>Bile leakage, (%)</b>            |                           |                                 |                              | 0.122           |
| A                                   | 9 (5)                     | 7 (10)                          | 2 (2)                        |                 |
| B                                   | 26 (14)                   | 14 (19)                         | 12 (10)                      |                 |
| C                                   | 3 (2)                     | -                               | 3 (3)                        | 0.532           |
| <b>Liver failure, (%)</b>           |                           |                                 |                              |                 |
| A                                   | 2 (1)                     | -                               | 2 (2)                        |                 |
| B                                   | 4 (2)                     | 1 (1)                           | 3 (3)                        |                 |
| C                                   | 1 (1)                     | -                               | 1 (1)                        |                 |
| <b>30-day reoperation, (%)</b>      | 24 (13)                   | 6 (8)                           | 16 (14)                      | 0.352           |

IQR: interquartile range.
